# Supplementary material for: NutriPhone: a mobile platform for low-cost point-of-care quantification of vitamin B12 concentrations
Source: PubMed Central journal article supplement (PMC4908584; doi:10.1038/srep28237), 2016-06-15
Supplement: srep28237-s1.pdf [file srep28237-s1.pdf]

# NutriPhone: a mobile platform for low-cost point-of-care quantification of vitamin B<sub>12</sub> concentrations

Seoho Lee,<sup>1,2</sup> Dakota O'Dell,<sup>2,3</sup> Jess Hohenstein,<sup>1</sup> Susannah Colt,<sup>2,4</sup> Saurabh Mehta\*<sup>2,4</sup> and David Erickson\*<sup>1,2</sup>

### Supplementary Information:

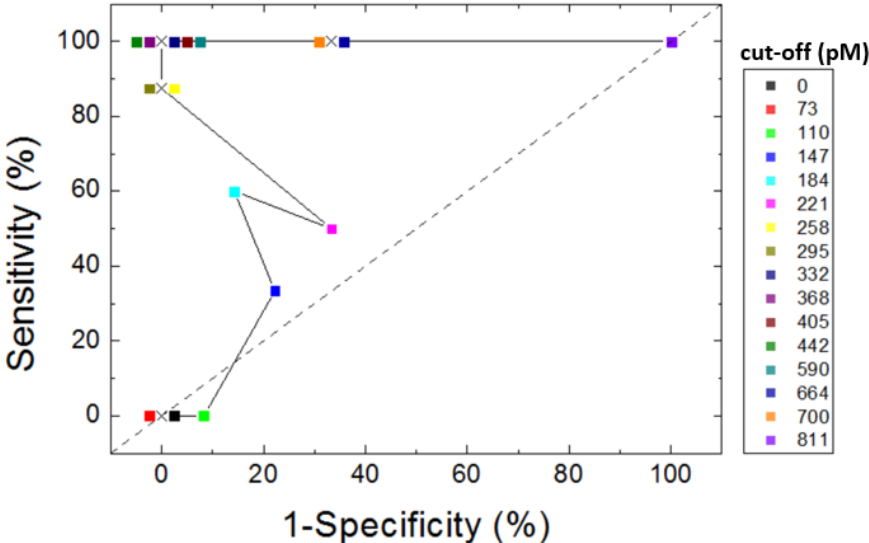

**Figure S1:** Receive Operating Characteristic (ROC) curve for the NutriPhone human trials. The legend shows the B12 cut-off points, and the dotted line shows the reference line.
